# Supplementary material
Source: PubMed Central journal article supplement (PMC4655812)
Supplement: NIHMS735871-supplement-1.pdf [file NIHMS735871-supplement-1.pdf]

| Patient # | #chr | pos       | genes   | TP1   | purity TP1 | TP2   | Purity TP2 | ref | genotype | location | function  | AA change    | dbSNP | COSMIC | Provean   | Polyphene2        | SIFT        |
|-----------|------|-----------|---------|-------|------------|-------|------------|-----|----------|----------|-----------|--------------|-------|--------|-----------|-------------------|-------------|
| 1         | 1    | 118166451 | FAM46C  | 91.5% | 95%        | 87.7% | 95%        | C   | C,T      | exonic   | missense  | p.Leu321Phe  | 0     | 0      | Damaging  | probably damaging | Deleterious |
| 1         | 12   | 25378561  | KRAS    | 60.0% | 95%        | 53.3% | 95%        | G   | G,A      | exonic   | missense  | p.Ala146Val  | 0     | 1      | Damaging  | probably damaging | Deleterious |
| 1         | 2    | 231177361 | SP140   | 85.1% | 95%        | 23.5% | 95%        | G   | G,A      | exonic   | missense  | p.Glu856Lys  | 0     | 0      | Damaging  | probably damaging | Deleterious |
| 1         | 17   | 7578442   | TP53    | 0.0%  | 95%        | 87.9% | 95%        | T   | T,C      | exonic   | missense  | p.Tyr163Cys  | 1     | 1      | Damaging  | probably damaging | Deleterious |
| 1         | 17   | 7577543   | TP53    | 82.5% | 95%        | 94.2% | 95%        | C   | C,T      | exonic   | missense  | p.Arg246Ile  | 0     | 1      | Damaging  | probably damaging | Deleterious |
| 1         | 17   | 7578388   | TP53    | 86.6% | 95%        | 0.3%  | 95%        | C   | C,T      | exonic   | missense  | p.Arg181His  | 0     | 1      | Damaging  | probably damaging | Neutral     |
| 2         | 1    | 118166361 | FAM46C  | 14.5% | 95%        | 23.7% | 95%        | T   | T,TA     | exonic   | nonsense  | p.Tyr291*    | 0     | 0      | Damaging  | NA                | NA          |
| 2         | 1    | 115256529 | NRAS    | 35.1% | 95%        | 25.5% | 95%        | T   | T,C      | exonic   | missense  | p.Gln61Arg   | 1     | 1      | NA        | benign            | Deleterious |
| 3         | 12   | 25380275  | KRAS    | 48.5% | 95%        | 21.1% | 95%        | T   | T,G      | exonic   | missense  | p.Gln61His   | 1     | 1      | Damaging  | benign            | Deleterious |
| 4         | 4    | 114278343 | ANK2    | 4.9%  | 90%        | 12.1% | 95%        | G   | G,A      | exonic   | missense  | p.Glu2857Lys | 0     | 0      | Damaging  | possibly damaging | Neutral     |
| 4         | 4    | 114238891 | ANK2    | 66.8% | 90%        | 39.4% | 95%        | C   | C,T      | exonic   | missense  | p.His908Tyr  | 0     | 0      | Damaging  | benign            | Neutral     |
| 4         | 13   | 73336064  | DIS3    | 19.7% | 90%        | 36.0% | 95%        | C   | C,G      | exonic   | missense  | p.Arg780Thr  | 0     | 0      | Damaging  | probably damaging | Deleterious |
| 4         | 4    | 187630327 | FAT1    | 30.3% | 90%        | 36.8% | 95%        | C   | C,G      | exonic   | missense  | p.Glu219Gln  | 0     | 0      | Tolerated | probably damaging | Neutral     |
| 4         | 3    | 168833696 | MECOM   | 29.5% | 90%        | 55.8% | 95%        | G   | G,A      | exonic   | missense  | p.Ser655Leu  | 0     | 0      | Damaging  | possibly damaging | Neutral     |
| 4         | 22   | 29195074  | XBP1    | 27.5% | 90%        | 40.3% | 95%        | C   | C,T      | exonic   | missense  | p.Glu99Lys   | 0     | 0      | Damaging  | probably damaging | Deleterious |
| 4         | 8    | 77765663  | ZFX4    | 12.8% | 90%        | 7.8%  | 95%        | C   | C,T      | exonic   | missense  | p.Ser2169Phe | 0     | 0      | Damaging  | probably damaging | Deleterious |
| 5         | 4    | 126239563 | FAT4    | 11.8% | 85%        | 10.0% | 85%        | C   | C,A      | exonic   | missense  | p.Ser666Tyr  | 0     | 0      | Tolerated | benign            | Deleterious |
| 5         | 12   | 25380275  | KRAS    | 18.6% | 85%        | 5.9%  | 85%        | T   | T,G      | exonic   | missense  | p.Gln61His   | 1     | 1      | Damaging  | benign            | Deleterious |
| 6         | 1    | 115256550 | NRAS    | 25%   | 95%        | 0.0%  | 95%        | T   | T,C      | exonic   | missense  | p.Pro54Leu   | 0     | 0      | Damaging  | probably damaging | Deleterious |
| 7         | 2    | 231155180 | SP140   | 47.6% | 95%        | 36.8% | 95%        | A   | A,T      | exonic   | nonsense  | p.Arg576*    | 0     | 0      | NA        | NA                | NA          |
| 9         | 3    | 64527277  | ADAMTS9 | 57.3% | 95%        | 26.1% | 90%        | G   | G,T      | exonic   | nonsense  | p.Cys1739*   | 0     | 0      | NA        | NA                | NA          |
| 9         | 12   | 25380275  | KRAS    | 42.3% | 95%        | 16.3% | 90%        | T   | T,G      | exonic   | missense  | p.Gln61His   | 1     | 1      | Damaging  | benign            | Deleterious |
| 10        | 1    | 115256528 | NRAS    | 17.1% | 95%        | 73.7% | 95%        | T   | T,G      | exonic   | missense  | p.Gln61His   | 1     | 1      | Damaging  | benign            | Deleterious |
| 11        | 12   | 25398281  | KRAS    | 21.4% | 90%        | 38.8% | 95%        | C   | C,T      | exonic   | missense  | p.Gly13Asp   | 1     | 1      | Damaging  | possibly damaging | Deleterious |
| 12        | 12   | 25380275  | KRAS    | 0.0%  | 95%        | 8.5%  | 65%        | T   | T,G      | exonic   | missense  | p.Gln61His   | 1     | 1      | Damaging  | benign            | Deleterious |
| 13        | 11   | 69456256  | CCND1   | 43.7% | 95%        | 50.0% | 95%        | A   | A,C      | exonic   | missense  | p.Ile59Leu   | 0     | 0      | Tolerated | benign            | Neutral     |
| 16        | 13   | 73347826  | DIS3    | 92.6% | 95%        | 64.2% | 85%        | G   | G,A      | exonic   | missense  | p.Pro412Leu  | 0     | 0      | NA        | probably damaging | Deleterious |
| 16        | 2    | 141986760 | LRP1B   | 42.4% | 95%        | 44.5% | 85%        | G   | G,A      | exonic   | missense  | p.Ser281Phe  | 0     | 0      | Damaging  | benign            | Deleterious |
| 16        | 2    | 231101961 | SP140   | 53.1% | 95%        | 57.1% | 85%        | G   | G,T      | exonic   | nonsense  | p.Glu75*     | 0     | 0      | Tolerated | NA                | NA          |
| 17        | 7    | 140453155 | BRAF    | 12.2% | 70%        | 33.0% | 95%        | C   | C,T      | exonic   | missense  | p.Asp594Asn  | 0     | 1      | Damaging  | probably damaging | Deleterious |
| 17        | 12   | 25380268  | KRAS    | 4.0%  | 70%        | 0.4%  | 95%        | A   | A,T      | exonic   | missense  | p.Tyr64Asn   | 0     | 1      | Damaging  | probably damaging | Deleterious |
| 17        | 12   | 25378562  | KRAS    | 5.4%  | 70%        | 46.5% | 95%        | C   | C,T      | exonic   | missense  | p.Ala146Thr  | 1     | 1      | Damaging  | probably damaging | Deleterious |
| 19        | 5    | 13864642  | DNAH5   | 38.0% | 95%        | 30.0% | 85%        | G   | G,A      | exonic   | missense  | p.Ala1487Val | 0     | 0      | Damaging  | benign            | Neutral     |
| 19        | 1    | 115256537 | NRAS    | 23.5% | 95%        | 21.0% | 95%        | T   | ATCCAGTA | exonic   | insertion | frameshift   | 0     | 0      | Damaging  | NA                | Deleterious |
| 19        | 21   | 32639116  | TIAM1   | 44.1% | 95%        | 27.8% | 85%        | G   | G,A      | exonic   | missense  | p.Ser58Phe   | 0     | 0      | Damaging  | probably damaging | Neutral     |
| 19        | 17   | 7577547   | TP53    | 0.2%  | 95%        | 4.7%  | 85%        | C   | C,T      | exonic   | missense  | p.Gly245Asp  | 1     | 1      | Damaging  | probably damaging | Deleterious |
| 21        | 13   | 73336064  | DIS3    | 32.2% | 95%        | 3.4%  | 60%        | C   | C,T      | exonic   | missense  | p.Arg780Lys  | 0     | 0      | Damaging  | probably damaging | Deleterious |
| 21        | 1    | 118166287 | FAM46C  | 44.2% | 95%        | 9.6%  | 60%        | T   | T,C      | exonic   | missense  | p.Leu266Pro  | 0     | 0      | Damaging  | probably damaging | Deleterious |
| 21        | 1    | 115256530 | NRAS    | 38.5% | 95%        | 12.0% | 60%        | G   | G,T      | exonic   | missense  | p.Gln61Lys   | 1     | 1      | Damaging  | benign            | Deleterious |
| 22        | 11   | 108121483 | ATM     | 41.3% | 95%        | 14.8% | 85%        | G   | G,T      | exonic   | nonsense  | p.Glu431*    | 0     | 0      | Damaging  | NA                | NA          |
| 22        | 11   | 108225584 | ATM     | 49.1% | 95%        | 20.4% | 85%        | C   | C,A      | exonic   | missense  | p.Leu2945Met | 0     | 0      | Tolerated | probably damaging | Neutral     |
| 22        | 13   | 73335945  | DIS3    | 97.4% | 95%        | 23.4% | 85%        | C   | C,G      | exonic   | missense  | p.Asp784His  | 0     | 0      | Tolerated | probably damaging | Deleterious |
| 22        | 7    | 43436462  | HECW1   | 54.7% | 95%        | 18.3% | 85%        | G   | G,A      | exonic   | missense  | p.Arg202Gln  | 0     | 0      | NA        | probably damaging | Neutral     |
| 22        | 2    | 141533765 | LRP1B   | 51.0% | 95%        | 14.0% | 85%        | C   | C,G      | exonic   | missense  | p.Gly1801Ala | 0     | 0      | Damaging  | probably damaging | Neutral     |

|           |    |           |               |       |     |       |     |   |     |        |          |              |   |   |           |                   |             |
|-----------|----|-----------|---------------|-------|-----|-------|-----|---|-----|--------|----------|--------------|---|---|-----------|-------------------|-------------|
| <b>22</b> | 2  | 152474835 | <b>NEB</b>    | 0.0%  | 95% | 13.6% | 85% | G | G,C | exonic | missense | p.Thr3677Ser | 0 | 0 | Tolerated | benign            | Neutral     |
| <b>22</b> | 1  | 16256446  | <b>SPEN</b>   | 49.9% | 95% | 17.3% | 85% | C | C,G | exonic | missense | p.Ile1237Met | 0 | 0 | Damaging  | possibly damaging | Neutral     |
| <b>22</b> | 22 | 29195088  | <b>XBP1</b>   | 97.9% | 95% | 24.0% | 85% | C | T,T | exonic | missense | p.Arg94Gln   | 0 | 0 | Tolerated | possibly damaging | NA          |
| <b>23</b> | 1  | 118166317 | <b>FAM46C</b> | 0.0%  | 95% | 23.5% | 95% | T | T,C | exonic | missense | p.Ile276Thr  | 0 | 0 | Damaging  | probably damaging | Deleterious |
| <b>23</b> | 4  | 187525551 | <b>FAT1</b>   | 0.0%  | 95% | 73.3% | 95% | G | G,T | exonic | missense | p.His3512Asn | 0 | 0 | Damaging  | benign            | Neutral     |
| <b>23</b> | 12 | 25398284  | <b>KRAS</b>   | 28.8% | 95% | 0.0%  | 95% | C | C,A | exonic | missense | p.Gly12Val   | 1 | 1 | Damaging  | probably damaging | Deleterious |
| <b>23</b> | 1  | 16260974  | <b>SPEN</b>   | 0.0%  | 95% | 18.4% | 95% | A | A,G | exonic | missense | p.Thr2747Ala | 0 | 0 | Tolerated | possibly damaging | Neutral     |
| <b>23</b> | 17 | 7577094   | <b>TP53</b>   | 24.4% | 95% | 91.5% | 95% | G | G,A | exonic | missense | p.Arg282Trp  | 1 | 1 | Tolerated | probably damaging | Deleterious |
| <b>24</b> | 6  | 106554331 | <b>PRDM1</b>  | 0.0%  | -   | 45.3% | -   | A | A,G | exonic | missense | p.Lys620Arg  | 0 | 0 | Damaging  | probably damaging | Deleterious |
| <b>25</b> | 12 | 25398285  | <b>KRAS</b>   | 10.7% | -   | 68.8% | -   | C | C/A | exonic | missense | p.Gly12Cys   | 1 | 1 | Damaging  | probably damaging | Deleterious |
| <b>25</b> | 17 | 7578553   | <b>TP53</b>   | 3.7%  | -   | 1.3%  | -   | T | T/C | exonic | missense | p.Tyr126Cys  | 0 | 1 | Damaging  | probably damaging | Deleterious |
